# Supplementary material for: Highly selective electrochemical sensing based on electropolymerized ion imprinted polyaniline (IIPANI) on a bismuth modified carbon paste electrode (CPE-Bi) for monitoring Nickel(ii) in river water
Source: Royal Society of Chemistry journal article supplement (doi:10.1039/d2ra05196f), 2022-01-01
Supplement: d2ra05196f1.pdf [file d2ra05196f1.pdf]

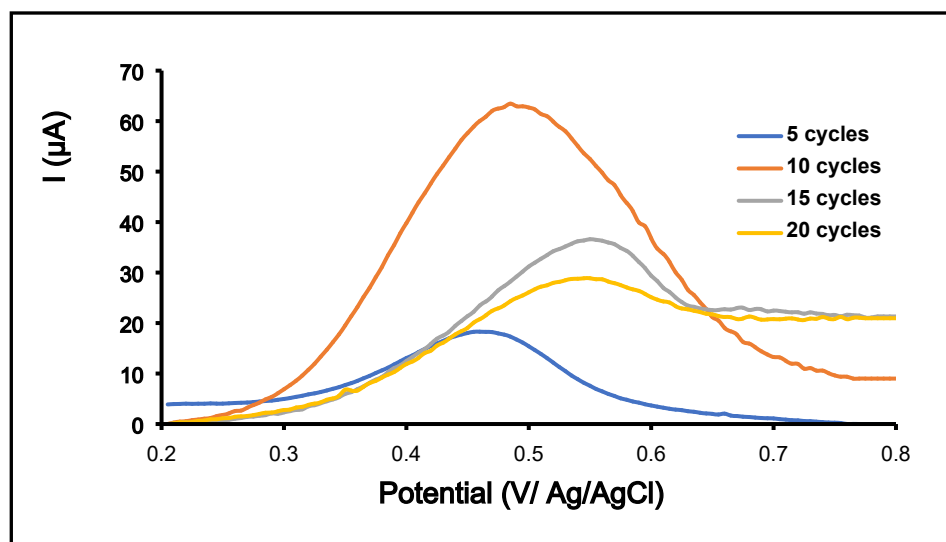

Supplementary 1. DPASV voltammogram of 0.1 μM Ni(II) on Ni-IPANI/CPE-Bi electrode at various scanning cycle

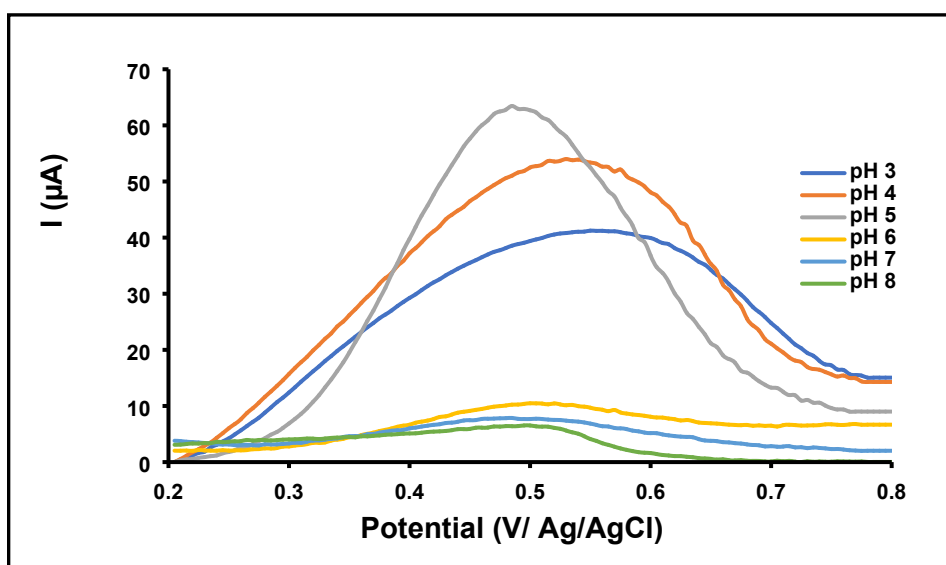

Supplementary 2. DPASV voltammogram of 0.1 μM Ni(II) on Ni-IPANI/CPE-Bi electrode at various pH

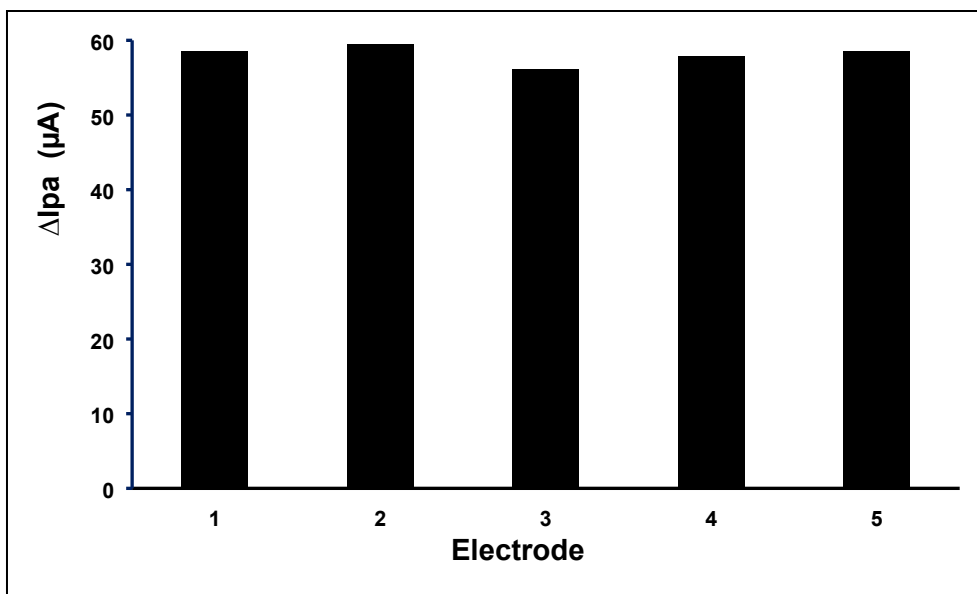

Supplementary 3. Peak current response of 1  $\mu M$  Ni(II) on five different Ni-IPANI/CPE-Bi electrode

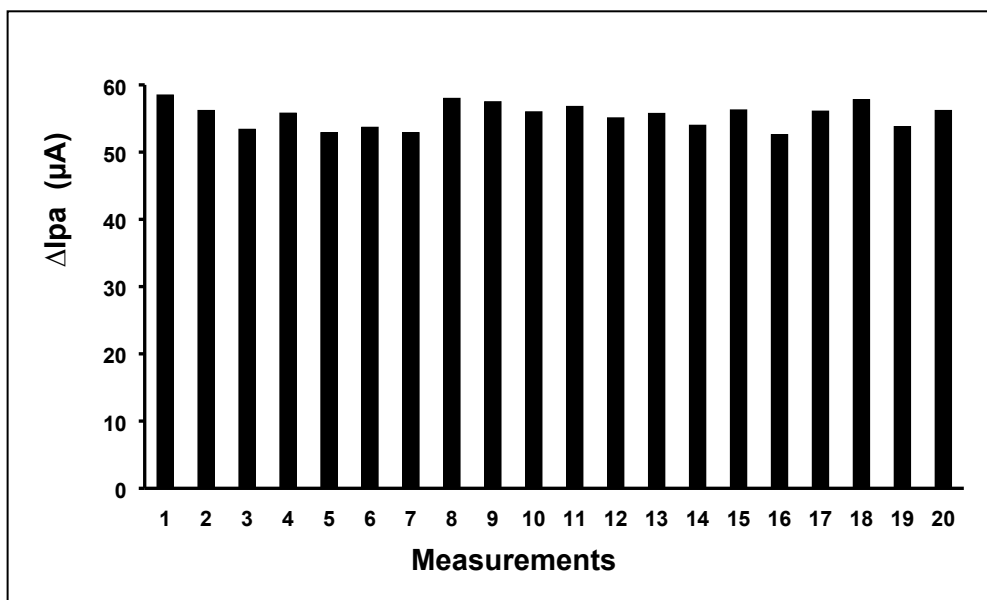

Supplementary 4. Peak current response of 1  $\mu M$  Ni(II) on Ni-IPANI/CPE-Bi electrode for 20 repetitive measurements
